# Supplementary material for: The Impact of Resistance Training Program on Static Balance in Multiple Sclerosis Population: A Randomized Controlled Trial Study
Source: J Clin Med. 2022 Apr 25;11(9):2405. doi: 10.3390/jcm11092405 (PMC9106059; doi:10.3390/jcm11092405)
Supplement: Supplementary file 1 [file jcm-11-02405-s001.zip › jcm-1673006-supplementary.pdf]

**Supplementary Table S1.** Training program characteristics.

| Week                 | 1   | 2   | 3   | 4   | 5   | 6   | 7   | 8   | 9   | 10  |
|----------------------|-----|-----|-----|-----|-----|-----|-----|-----|-----|-----|
| Intensity (% 1-RM)   | 60  | 65  | 70  | 75  | 60  | 65  | 70  | 75  | 75  | 60  |
| Sets for exercise    | 2   | 3   | 3   | 4   | 2   | 3   | 3   | 3   | 4   | 2   |
| Repetitions          | 15  | 13  | 9   | 8   | 15  | 13  | 9   | 8   | 8   | 15  |
| Rest between set (s) | 120 | 120 | 120 | 120 | 120 | 120 | 120 | 120 | 120 | 120 |

1-RM: one repetition maximum.

### Supplementary Information File S1

Three channels of force-platform output-vertical force (FZ), moment about the medial/lateral axis (MY), and moment about the anterior/posterior axis (MX)-were sampled at 10 Hz each and used to calculate the coordinates of the instantaneous COP.

The variables used in the formulas are explained below:

- $i = \{0.01, 0.02, \dots, 29.99\}$  referring to registered times.
- $X_i$  and  $Y_i$  make reference to the two-dimension spatial coordinates of the center-of-pressure (COP).
- ABS refers to absolute value.
- $\sigma_x$  and  $\sigma_y$  refers to the standard deviation of each coordinate in the time sample.
- $\sigma_{xy}$  makes reference to the covariance of both.
- $v_x$  and  $v_y$  refers to the velocity (rate of change of the position) in each spatial axis.
- $\sigma_{v_x}$  and  $\sigma_{v_y}$  refer to the standard deviation of each coordinate velocity.
- F refers to the Fisher-Snedecor distribution.
